# Supplementary material
Source: PubMed Central journal article supplement (PMC3630860)
Supplement: supp_M112.434951_jbc.M112.434951-1.pdf [file supp_M112.434951_jbc.M112.434951-1.pdf]

**Liu et al Supplemental Fig. 1**

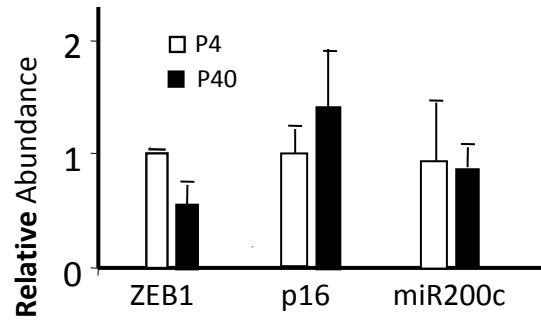

Real time PCR showing little change in expression of ZEB1, p16 or miR200c as TKO MEFs are passaged in culture. P4 and P40 indicate passages 4 and 40. Results were normalized to the level of actb ( $\beta$ -actin) mRNA.

Liu et al Supplemental Fig. 2

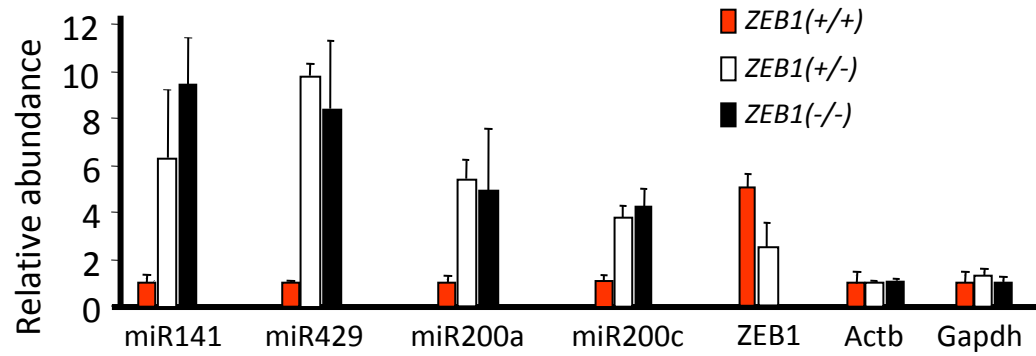

Induction of miR200 family members with ZEB1 mutation in MEFs. ZEB1 We have described ZEB1 mutant MEFs previously (9). Actb (b-actin) and Gapdh (glyceraldehyde 3-phosphate dehydrogenase) are mRNA controls.
