# Supplementary material
Source: PubMed Central journal article supplement (PMC3630860)
Supplement: supp_M112.434951_jbc.M112.434951-2.pdf [file supp_M112.434951_jbc.M112.434951-2.pdf]

Supplementary table 1. Primers used for real-time PCR

| Primer name | Sequence                    | Tm °C | Amplicon (bp) |
|-------------|-----------------------------|-------|---------------|
| Mm cdh1 LP  | 5'- GTCTACCAAAGTGACGCTGAA   | 54.9  | 111           |
| Mm cdh1 RP  | 5'- GGGTACACGCTGGGAAACAT    | 57.6  |               |
| Mm Bmi1 LP  | 5'- ATCCCCACTTAATGTGTGTCCT  | 55.9  | 116           |
| Mm Bmi1 RP  | 5'- CTTGCTGGTCTCCAAGTAACG   | 55.7  |               |
| Mm p16 LP:  | 5'- CCCAACGCCCCGAAC         | 58.6  | 79            |
| Mm p16 RP   | 5'- GCAGAAGAGCTGCTACGTGAA   | 57.3  |               |
| Mm p21 LP   | 5'- GTGGCCTTGTGCTGTCTT      | 58.1  | 126           |
| Mm p21 RP   | 5'- GCGCTTGGAGTGATAGAAATCTG | 55.9  |               |
| Mm p27 LP   | 5'- TTGGGTCTCAGGCAAACCTCT   | 56.3  | 157           |
| Mm p27 RP   | 5'- TCTGTTCTGTTGGCCCTTTT    | 54.7  |               |
| Mm p57 LP   | 5'- GGAGCAGGACGAGAATCAAG    | 55.3  | 189           |
| Mm p57 RP   | 5'- ACGTTTGGAGAGGGACACC     | 57.1  |               |
| Mm ARF LP   | 5'- TGAGGCTAGAGAGGATCTTGAGA | 56.3  | 91            |
| Mm ARF RP   | 5'- GCAGAAGAGCTGCTACGTGAA   | 57.3  |               |
| Mm Zeb1 LP  | 5'- TGGCAAGACAACGTGAAAGA    | 60    | 200           |
| Mm Zeb1 RP  | 5'- AACTGGGAAAATGCATCTGG    | 60    |               |
| Mm ACTB LP  | 5'- GGCTGTATTCCCCTCCATCG    | 57.6  | 154           |
| Mm ACTB RP  | 5'- CCAGTTGGTAACAATGCCATGT  | 55.9  |               |
| Mm GAPDH LP | 5'- AGGTCGGTGTGAACGGATTTG   | 57.6  | 123           |
| Mm GAPDH RP | 5'- TGTAGACCATGTAGTTGAGGTCA | 55.1  |               |

Supplementary table 2. Primers used for detecting transcripts of miRs

| Primer name      | Sequence                     | Tm °C | Amplicon (bp) |
|------------------|------------------------------|-------|---------------|
| Mm mir200c LP    | 5'- taatactgccgggtaaatgatgga | 55.6  | 68            |
| Mm mir200b LP    | 5'- taatactgcctggaatgatga    | 51    | 68            |
| Mm mir200a LP    | 5'- taacactgtctggaacgatgt    | 53.5  | 68            |
| Mm miACTB LP     | 5'- GGCTGGCCTGTACACTGACTTGA  | 61.1  | 110           |
| Mm miGAPDH LP    | 5'- CACTGAGCATCTCCCTCACA     | 56.6  | 155           |
| Universal miR RP | 5'- GCGAGCACAGAATTAATACGAC   | 53.9  |               |

Supplementary table 3. Primers used for ChIP assay PCR

| Primer name        | Sequence (5' - 3')       | Tm °C | Amplicon (bp) |
|--------------------|--------------------------|-------|---------------|
| Mm miR200a Pro LP  | 5'- GTGTCACTGTCCCCTTGCTT | 57.6  | 156           |
| Mm miR200a Pro RP  | 5'- GCAGGAAGACACAGGTGGTT | 57.6  |               |
| Mm miR200b Pro LP  | 5'- GCCCACTGAGTGAACCTCAT | 57.1  | 201           |
| Mm miR200b Pro RP  | 5'- TAGTCCTTCCCAGAGGCTGA | 57.1  |               |
| Mm miR200c Pro LP1 | 5'- GCCAAGGGTAGCACATTGAT | 55.4  | 246           |
| Mm miR200c Pro RP1 | 5'- AGTCCCAAAGCTGTCCCTTT | 56.6  |               |
| Mm miR200c Pro LP2 | 5'- CTGGTTTTGGCCTCAGTGAT | 55.3  | 175           |
| Mm miR200c Pro RP2 | 5'- TACCCAACCAGTCCACCTTC | 56.6  |               |
